# Supplementary material for: Summertime tropospheric ozone source apportionment study in Madrid (Spain)
Source: Copernicus journal article supplement (doi:10.5194/egusphere-2023-2056), 2023-10-06
Supplement: Supplementary file 2 [file egusphere-2023-2056-supplement.pdf]

**Table S1. WRF model physics options and parametrizations.**

| Option                  | Setup                                       |
|-------------------------|---------------------------------------------|
| Initialization          | ERA5                                        |
| Shortwave radiation     | MM5                                         |
| Longwave radiation      | GFDL                                        |
| Land-surface model      | Noah LSM                                    |
| Microphysics scheme     | WSM6                                        |
| PBL Scheme              | Boulac                                      |
| Surface Layer option    | Monin-Obukhov                               |
| Cumulus Parametrization | No                                          |
| Urban Physics           | BEP (Building Environment Parameterization) |
| Nudging                 | No                                          |

**Table S2. Horizontal dimensions and resolution of WRF and CMAQ modeling domains.**

| Domains | Geographic area     | WRF X-Y dimensions (grid cells) | CMAQ X-Y dimensions (grid cells) | Horizontal resolution (km) |
|---------|---------------------|---------------------------------|----------------------------------|----------------------------|
| D1      | Europe              | 560 x 496                       | 459 x 406                        | 12                         |
| D2      | Iberian Peninsula   | 384 x 312                       | 300 x 240                        | 4                          |
| D3      | Greater Madrid area | 256 x 256                       | 136 x 144                        | 1                          |

**Table S3. Compliance objectives of Directive 2008/50/EC and those defined by the World Health Organization (WHO) in relation to the pollutant analyzed.**

| Average time                  | O <sub>3</sub> (µg m <sup>-3</sup> )                                                                       |                                                        |
|-------------------------------|------------------------------------------------------------------------------------------------------------|--------------------------------------------------------|
|                               | R.D 102/2011                                                                                               | OMS                                                    |
| Maximum daily eight-hour mean | 120 µg m <sup>-3</sup> not to be exceeded on more than 25 days per calendar year averaged over three years | 100 µg m <sup>-3</sup><br>3-4 exceedance days per year |

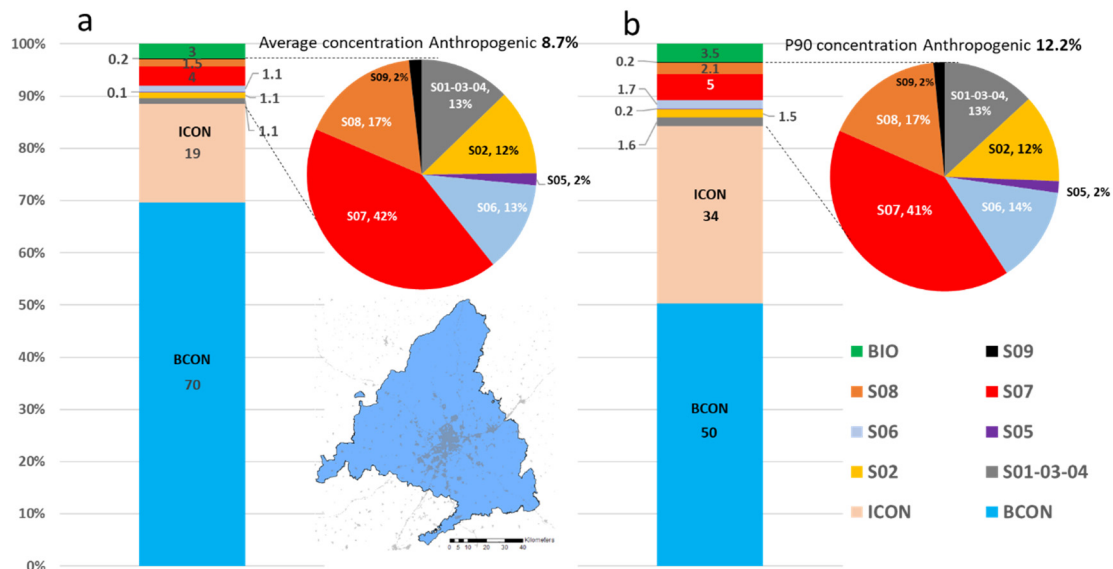

Figure S1. Spatially-averaged source apportionment (%) over the whole Madrid Region for (a) O<sub>3</sub> monthly mean and (b) 90<sup>th</sup> percentile O<sub>3</sub> concentration.

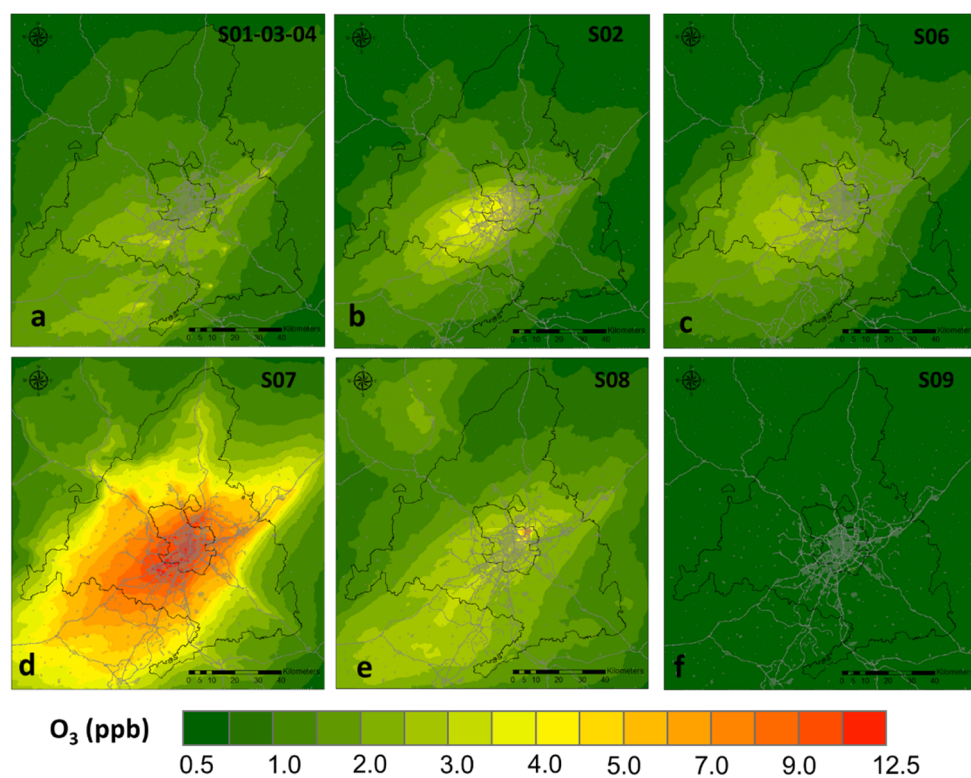

Figure S2. Absolute contribution to the 90<sup>th</sup> percentile of O<sub>3</sub> concentration of the main emitting sectors.

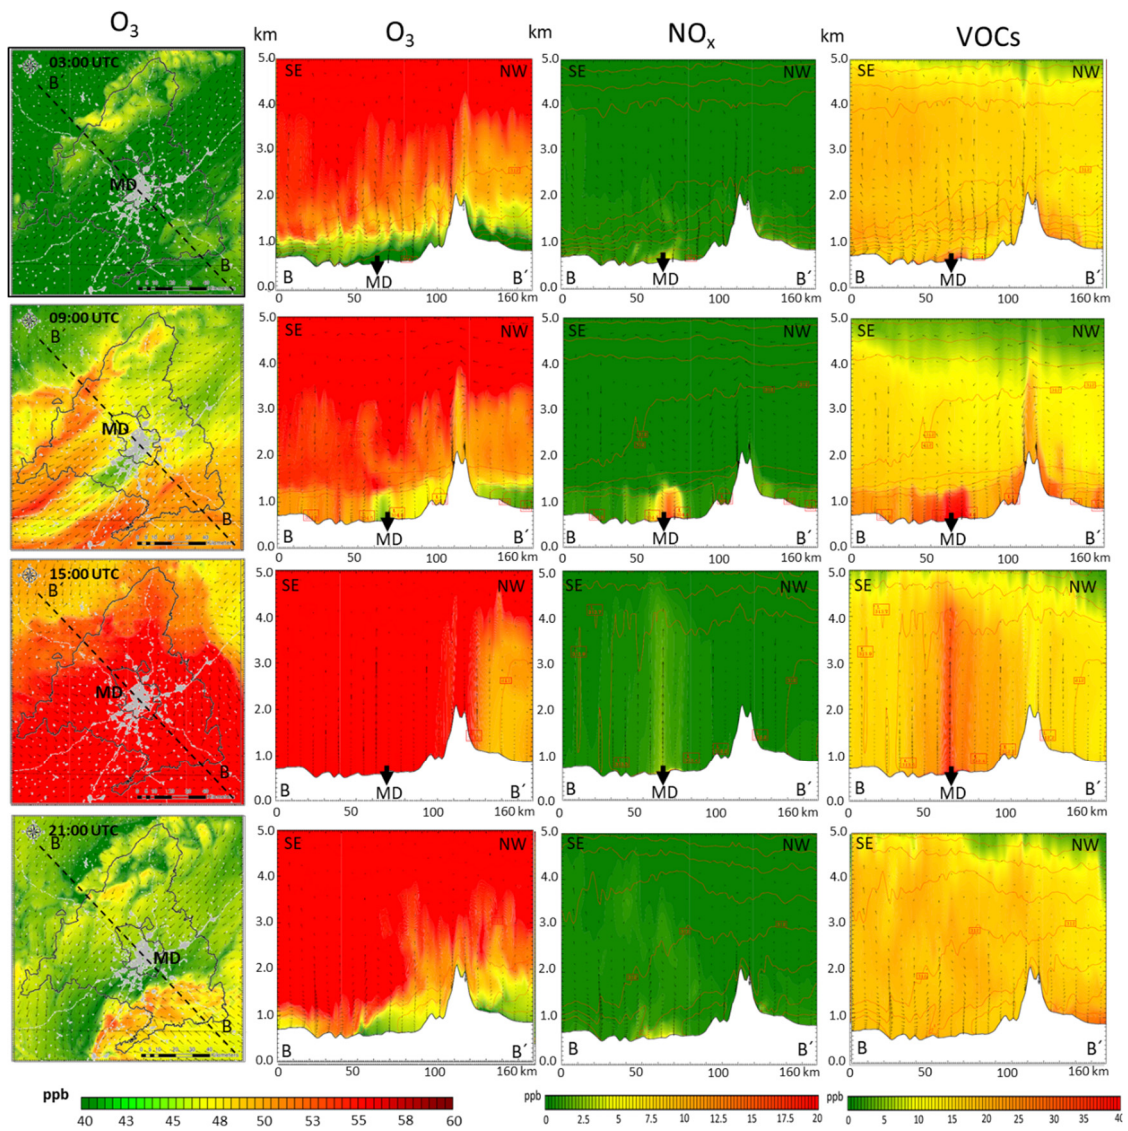

Figure S3. Accumulation period: hourly concentration during July 27<sup>th</sup>. From left to right, plan view and SE-NW cross section (up to 5 km height)  $O_3$  concentrations (ppb),  $NO_x$  (ppb) and VOCs (ppb) at 3:00, 9:00, 15:00, 21:00 UTC hours. MD = Madrid City.

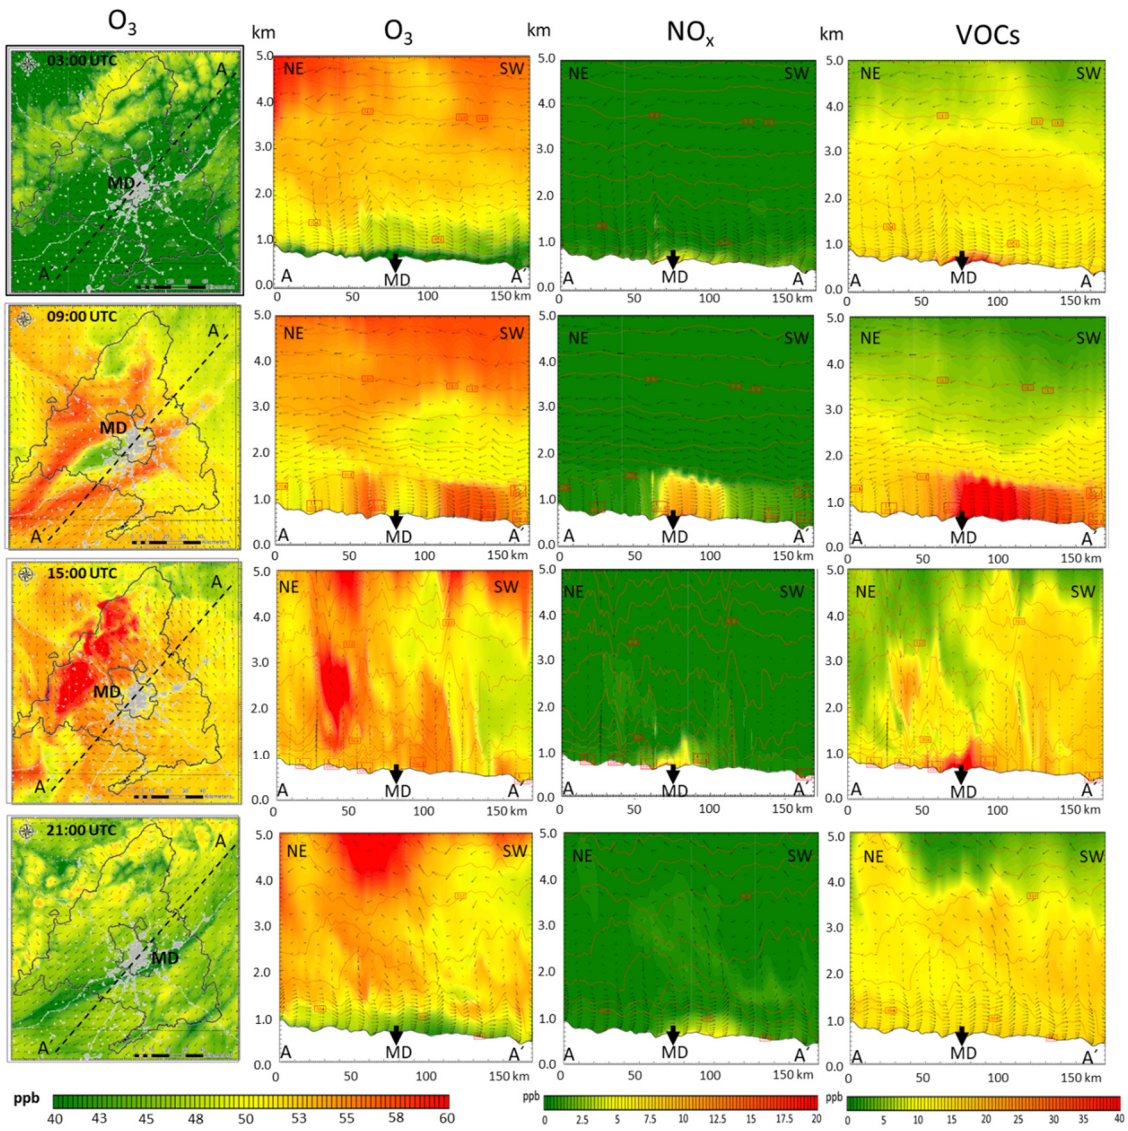

Figure S4. Accumulation period: hourly concentration during July 6<sup>th</sup>. From left to right, plan view and NE-SW cross section (up to 5 km height)  $O_3$  concentrations (ppb),  $NO_x$  (ppb) and VOCs (ppb) at 3:00, 9:00; 15:00, 21: 00 UTC hours. MD = Madrid City.

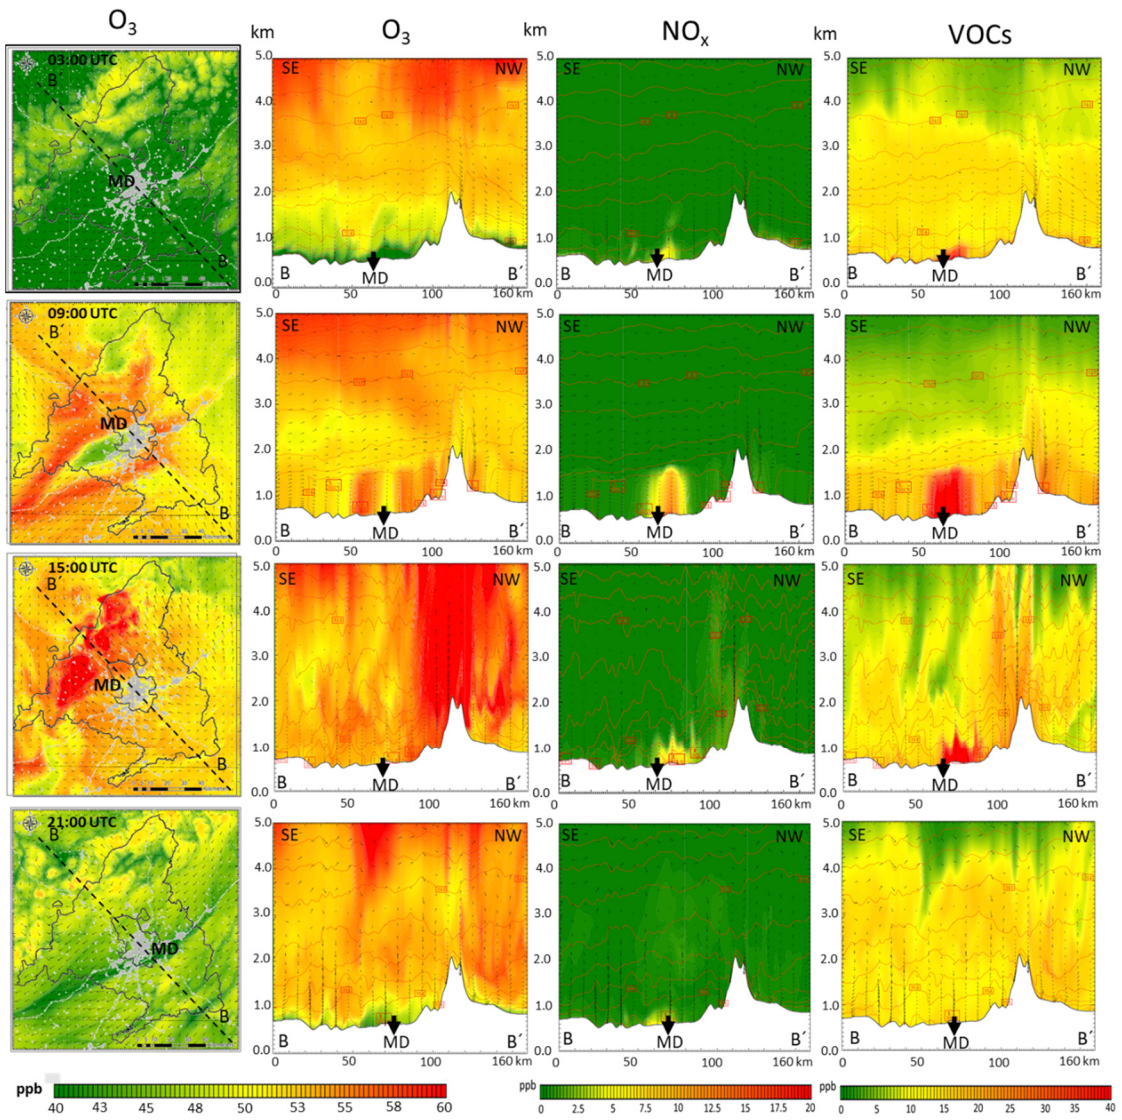

**Figure S5. Accumulation period: hourly concentration during July 6<sup>th</sup>. From left to right, plan view and SE-NW cross section (up to 5 km height)  $O_3$  concentrations (ppb),  $NO_x$  (ppb) and VOCs (ppb) at 3:00, 9:00; 15:00, 21: 00 UTC hours. MD = Madrid City.**

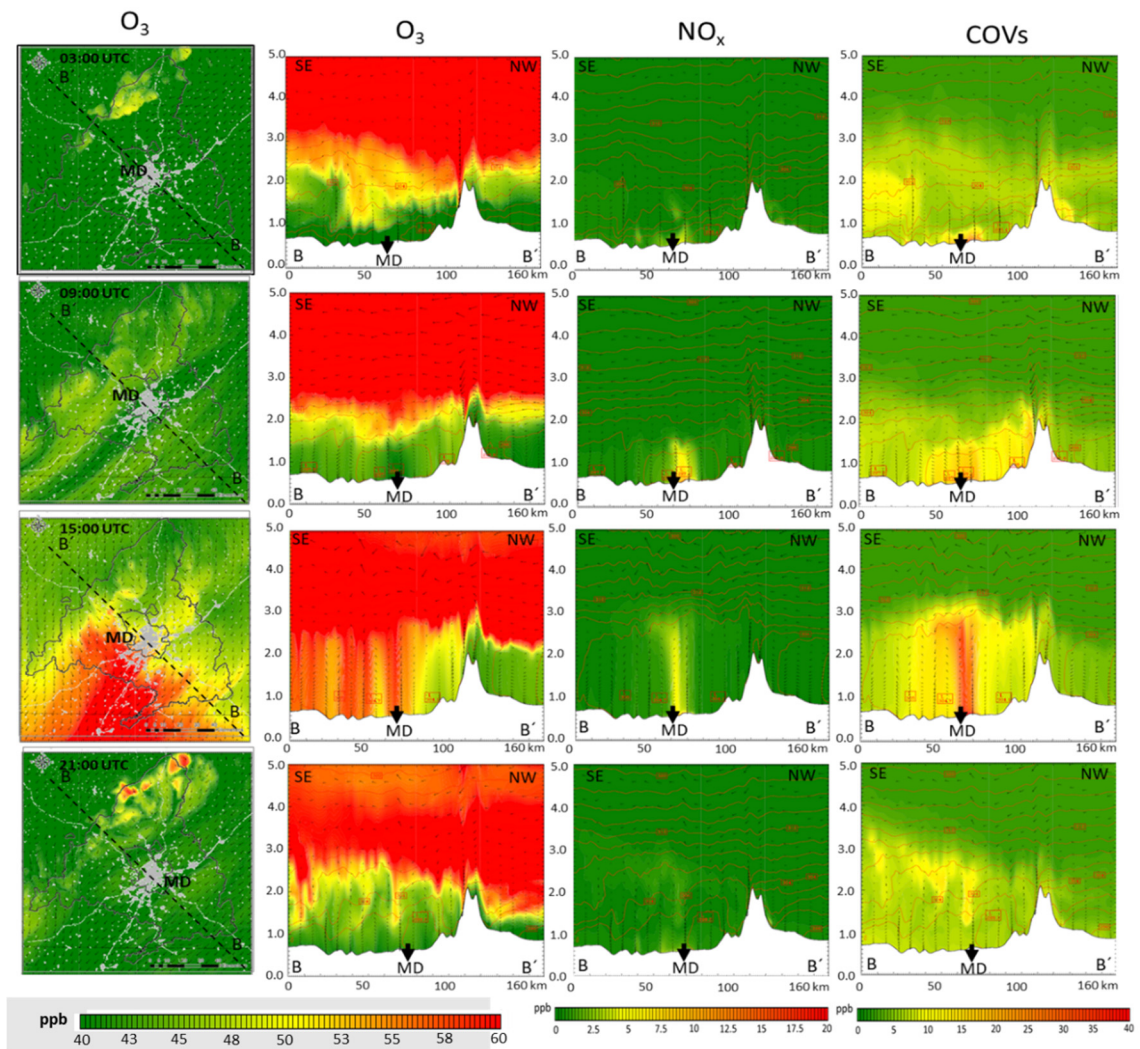

Figure S6. Advection period: hourly concentration during July 13<sup>th</sup>. From left to right, plan view and SE-NW cross section (up to 5 km height)  $O_3$  concentrations (ppb),  $NO_x$  (ppb) and VOCs (ppb) at 3:00, 9:00, 15:00, 21: 00 UTC hours. MD = Madrid City.

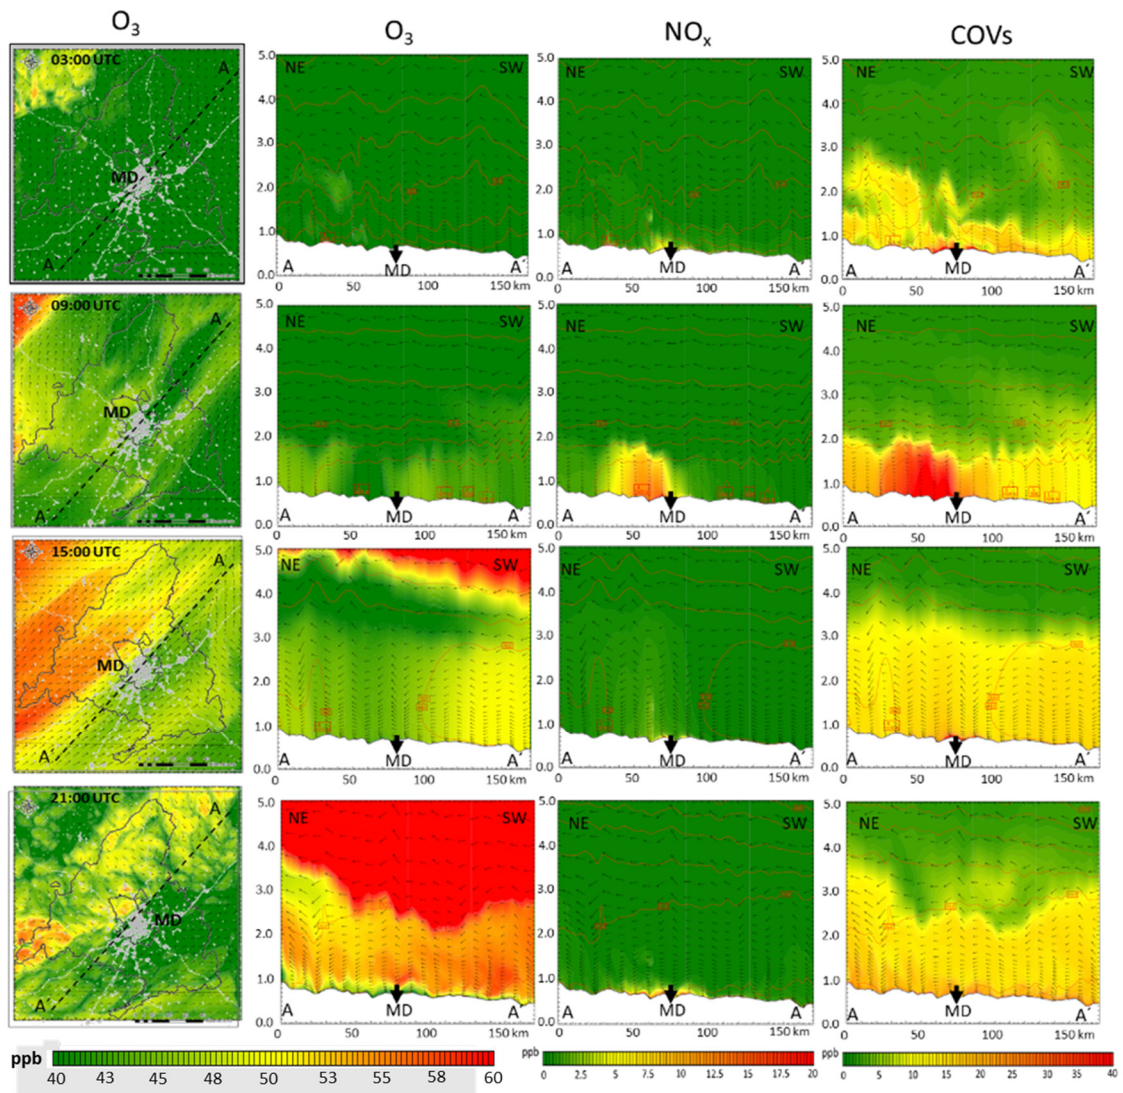

**Figure S7. Advection period: hourly concentration during July 20<sup>th</sup>. From left to right, plan view and NE-SW cross section (up to 5 km height)  $O_3$  concentrations (ppb),  $NO_x$  (ppb) and VOCs (ppb) at 3:00, 9:00, 15:00, 21: 00 UTC hours. MD = Madrid City.**

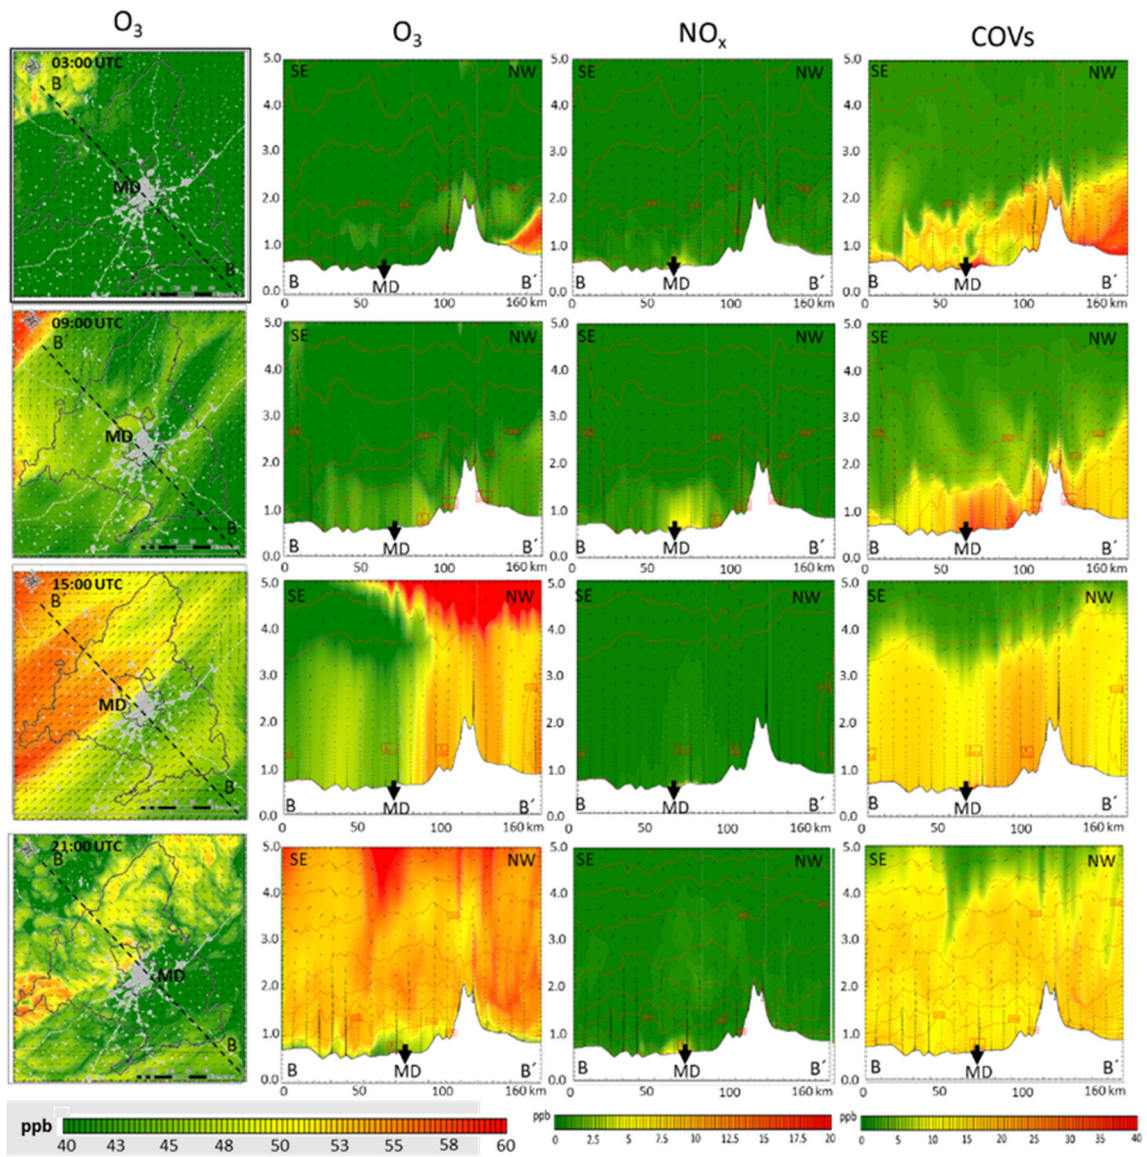

Figure S8. Advection period: hourly concentration during July 20<sup>th</sup>. From left to right, plan view and SE-NW cross section (up to 5 km height)  $O_3$  concentrations (ppb),  $NO_x$  (ppb) and VOCs (ppb) at 3:00, 9:00, 15:00, 21: 00 UTC hours. MD = Madrid City.



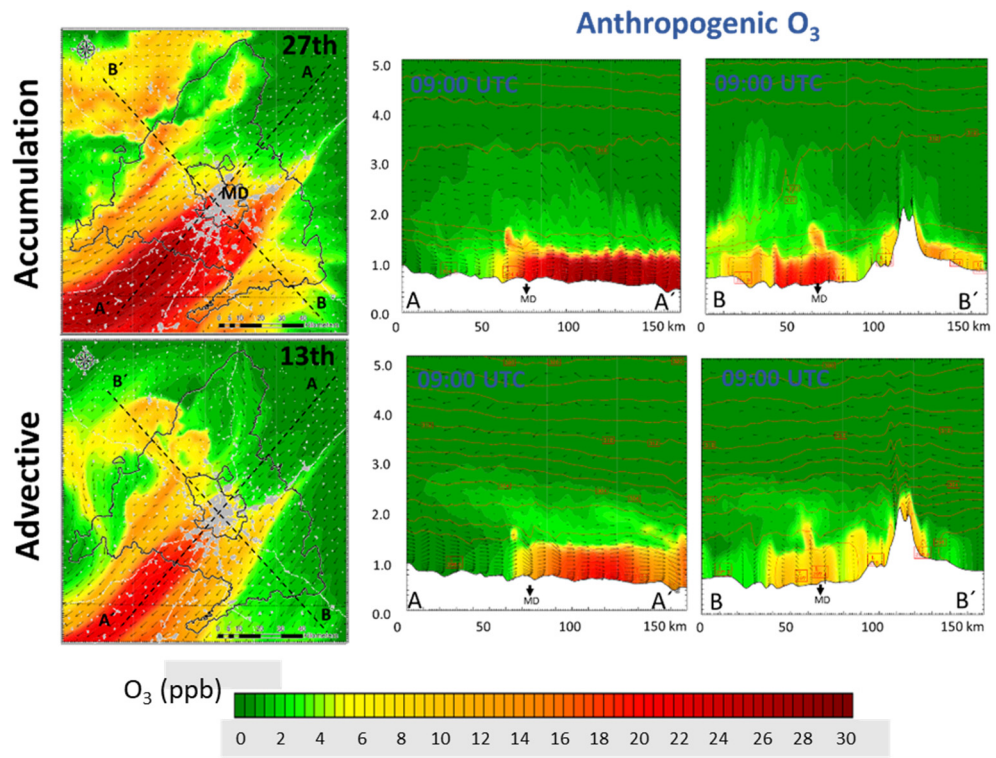

Figure S9. O<sub>3</sub> concentration (ppb) at 09:00 UTC for July 27<sup>th</sup> (accumulation period) and July 13<sup>th</sup> (advective period). From left to right, plan view, NE-SW and SE-NW cross sections (up to 5 km height). MD = Madrid City.

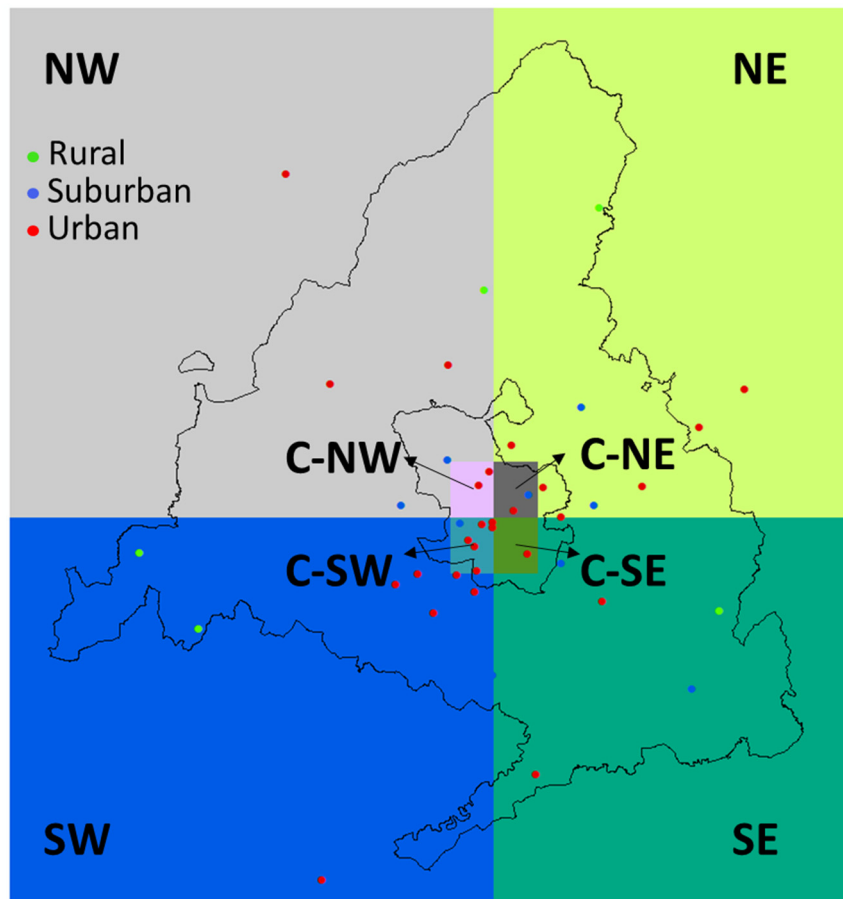

Figure S10. Geographical division (quadrants) of the study area for the analysis of individual monitoring station locations

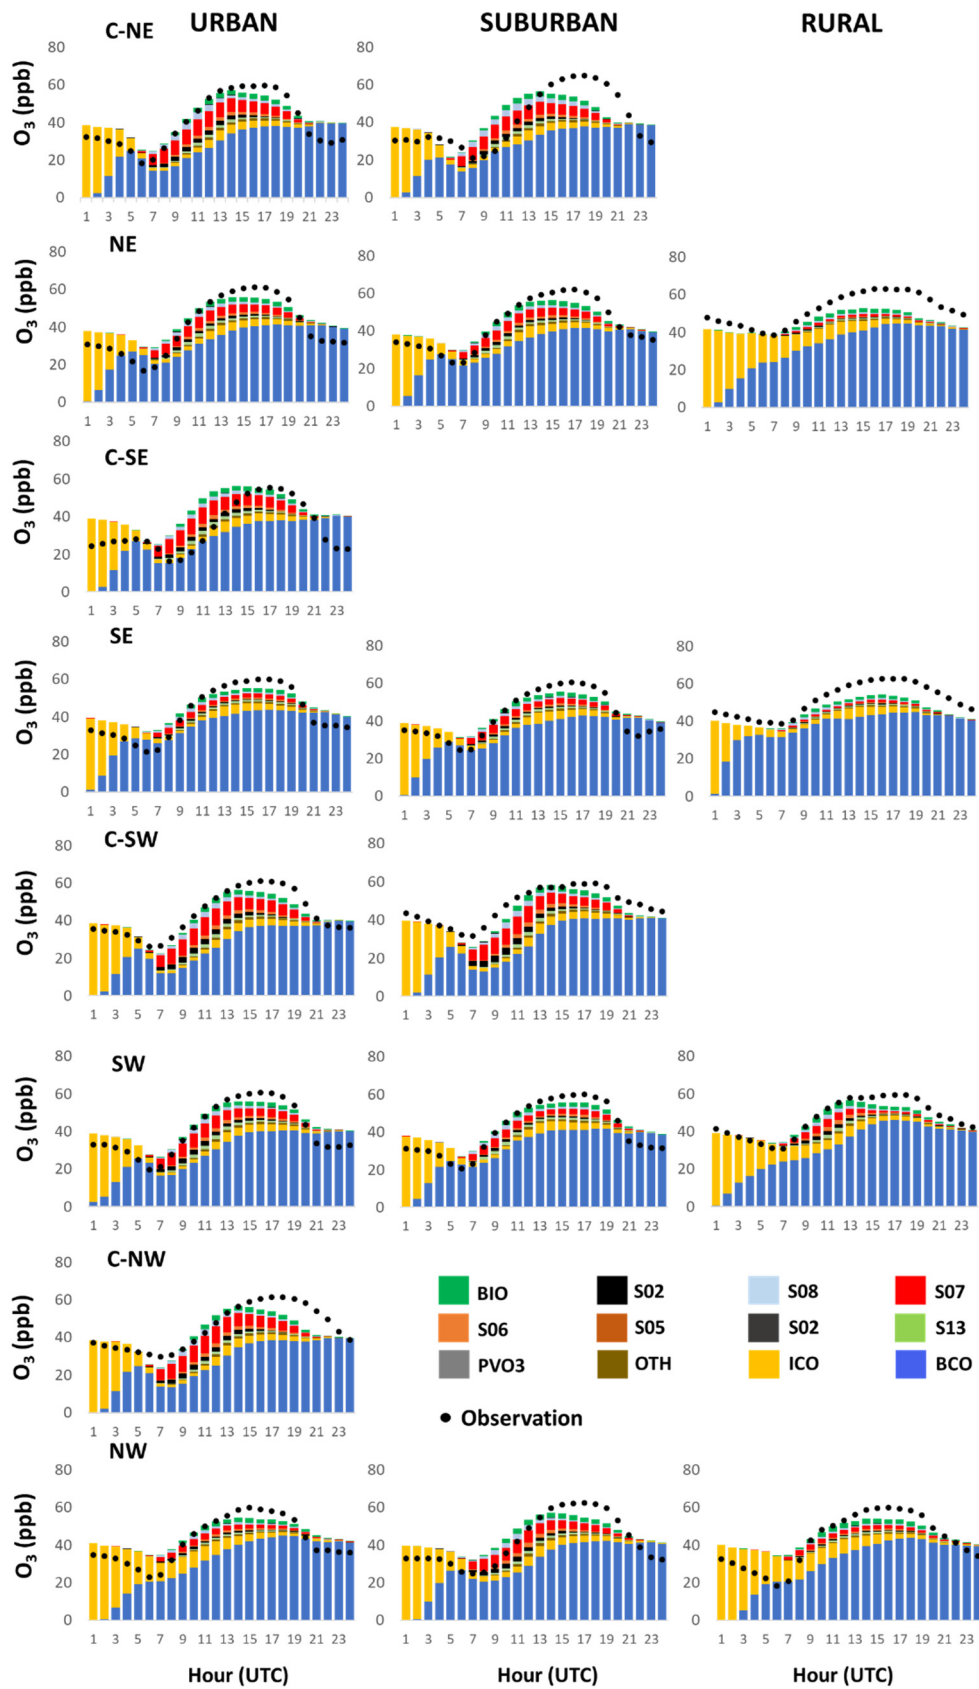

Figure S11. Hourly contribution (ppb) for the monthly average at the location of monitoring sites by geographical quadrant.

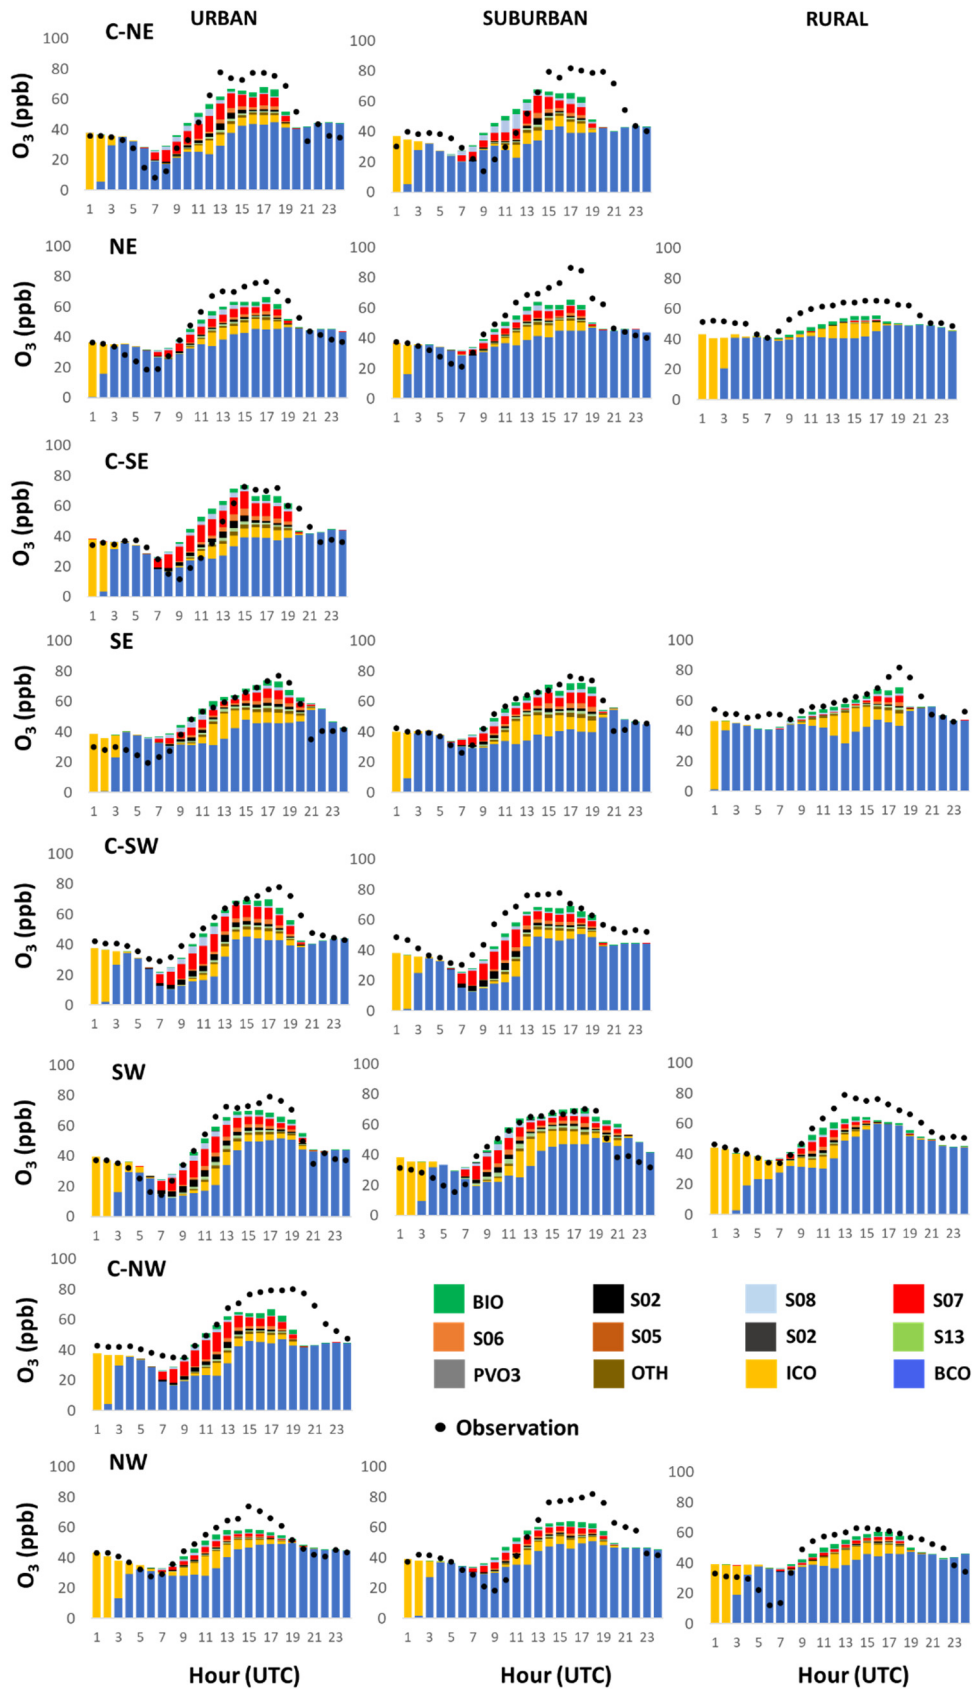

Figure S12. Hourly contribution (ppb) for July 27<sup>th</sup>, 2016 at the location of monitoring sites by geographical quadrant.

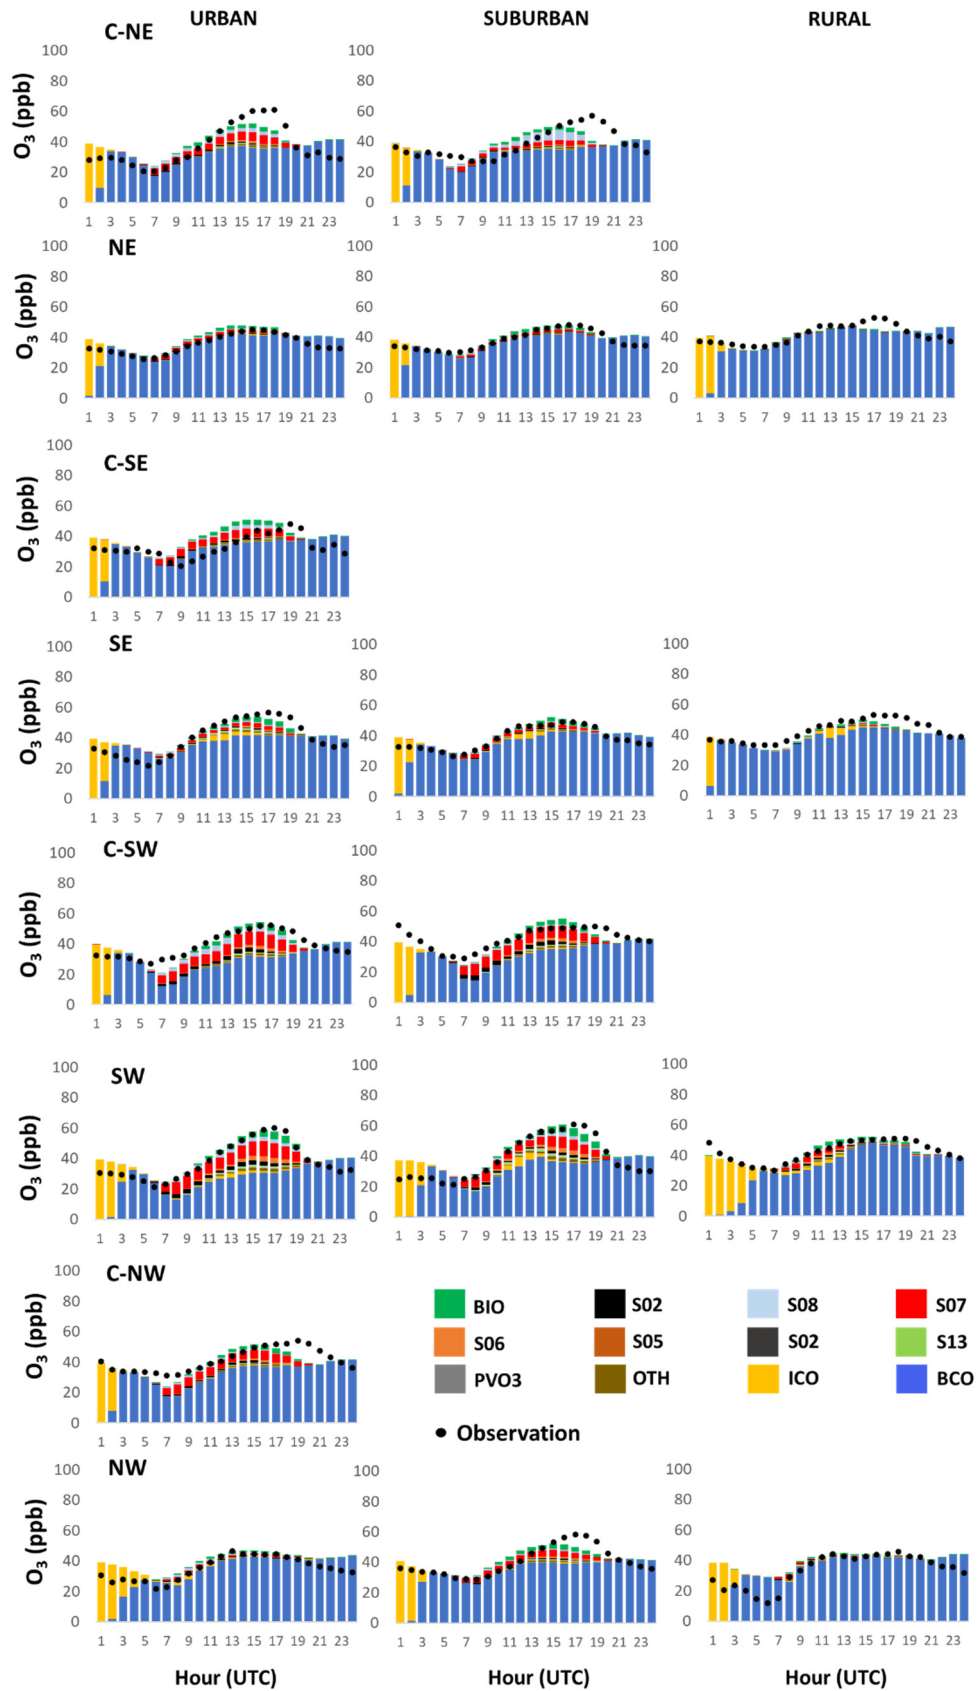

Figure S13. Hourly contribution (ppb) for July 13<sup>th</sup>, 2016 at the location of monitoring sites by geographical quadrant.

**Table S4. Model performance statistics by station type for O<sub>3</sub> concentration.**

| Station          | FAC2 | MB<br>( $\mu\text{g m}^{-3}$ ) | MGE<br>( $\mu\text{g m}^{-3}$ ) | NMB   | NMGE | RMSE<br>( $\mu\text{g m}^{-3}$ ) | r    | IOA  |
|------------------|------|--------------------------------|---------------------------------|-------|------|----------------------------------|------|------|
| Industrial       | 0.95 | 7.82                           | 14.53                           | 0.10  | 0.18 | 18.67                            | 0.84 | 0.70 |
| Rural            | 0.98 | -2.88                          | 13.79                           | -0.03 | 0.14 | 17.72                            | 0.79 | 0.67 |
| Suburban         | 0.93 | 3.75                           | 17.75                           | 0.05  | 0.21 | 23.55                            | 0.76 | 0.68 |
| Urban background | 0.87 | 10.56                          | 22.35                           | 0.15  | 0.29 | 29.03                            | 0.67 | 0.61 |
| Urban traffic    | 0.85 | 12.91                          | 21.33                           | 0.18  | 0.29 | 27.97                            | 0.74 | 0.62 |

**Table S5. Model performance statistics by station for O<sub>3</sub> concentration.**

| STATION                     | TYPE                | FAC2  | MB<br>( $\mu\text{g m}^{-3}$ ) | MGE<br>( $\mu\text{g m}^{-3}$ ) | NMB | RMSE<br>( $\mu\text{g m}^{-3}$ ) | r    | IOA  |
|-----------------------------|---------------------|-------|--------------------------------|---------------------------------|-----|----------------------------------|------|------|
| ARGANDA DEL REY             | Industrial          | 0.956 | 5.8                            | 14.6                            | 0.1 | 18.6                             | 0.84 | 0.72 |
| FUENLABRADA                 | Industrial          | 0.948 | 9.9                            | 14.4                            | 0.1 | 18.7                             | 0.84 | 0.69 |
| VILLA DEL PRADO             | Rural               | 0.985 | 0.8                            | 11.8                            | 0.0 | 15.3                             | 0.82 | 0.72 |
| SAN MARTIN DE VALDEIGLESIAS | Rural               | 0.997 | 0.0                            | 10.5                            | 0.0 | 13.7                             | 0.80 | 0.71 |
| ORUSCO DE TAJUÑA            | Rural               | 1.000 | 10.0                           | 12.7                            | 0.1 | 16.1                             | 0.84 | 0.66 |
| GUADALIX DE LA SIERRA       | Rural               | 0.924 | 7.6                            | 17.9                            | 0.1 | 22.7                             | 0.79 | 0.67 |
| EL ATAZAR                   | Rural               | 0.996 | 11.2                           | 16.1                            | 0.1 | 20.7                             | 0.69 | 0.58 |
| ALGETE                      | Suburban            | 1.000 | 4.4                            | 13.1                            | 0.1 | 17.2                             | 0.81 | 0.72 |
| LA SAGRA                    | Suburban            | 0.940 | 7.3                            | 14.5                            | 0.1 | 20.0                             | 0.81 | 0.71 |
| MOSTOLES                    | Suburban            | 0.940 | 8.1                            | 15.5                            | 0.1 | 20.6                             | 0.83 | 0.71 |
| MAJADAHONDA                 | Suburban            | 0.962 | 2.7                            | 15.7                            | 0.0 | 21.4                             | 0.81 | 0.71 |
| VALDEMORO                   | Suburban            | 0.910 | 6.7                            | 16.0                            | 0.1 | 22.1                             | 0.80 | 0.71 |
| RIVAS                       | Suburban            | 0.913 | 7.0                            | 17.3                            | 0.1 | 23.0                             | 0.81 | 0.70 |
| VACIAMADRID                 |                     |       |                                |                                 |     |                                  |      |      |
| TORREJON DE ARDOZ           | Suburban            | 0.901 | 10.0                           | 17.6                            | 0.1 | 23.6                             | 0.82 | 0.70 |
| AZUQUECA DE HENARES         | Suburban            | 0.948 | 3.6                            | 16.8                            | 0.0 | 21.6                             | 0.78 | 0.70 |
| TOLEDO2                     | Suburban            | 0.954 | 0.9                            | 16.3                            | 0.0 | 22.0                             | 0.72 | 0.69 |
| ARANJUEZ                    | Suburban            | 0.910 | 9.3                            | 16.7                            | 0.1 | 22.5                             | 0.77 | 0.67 |
| EL PARDO                    | Suburban            | 0.922 | 0.2                            | 22.2                            | 0.0 | 28.0                             | 0.74 | 0.65 |
| CASA DE CAMPO               | Suburban            | 0.942 | 1.7                            | 20.1                            | 0.0 | 26.7                             | 0.61 | 0.63 |
| JUAN CARLOS I               | Suburban            | 0.895 | 4.6                            | 24.2                            | 0.1 | 31.0                             | 0.61 | 0.63 |
| ALCORCON                    | Urban<br>Background | 0.958 | 4.8                            | 14.6                            | 0.1 | 19.7                             | 0.83 | 0.73 |
| GUADALAJARA                 | Urban<br>Background | 0.935 | 7.4                            | 15.6                            | 0.1 | 21.4                             | 0.77 | 0.70 |
| TRES OLIVOS                 | Urban<br>Background | 0.921 | 4.0                            | 22.8                            | 0.0 | 29.2                             | 0.66 | 0.63 |
| VILLAVERDE                  | Urban<br>Background | 0.863 | 13.1                           | 22.2                            | 0.2 | 29.4                             | 0.66 | 0.61 |
| FAROLILLO                   | Urban<br>Background | 0.883 | 5.8                            | 22.4                            | 0.1 | 29.7                             | 0.62 | 0.62 |
| RETIRO                      | Urban<br>Background | 0.860 | 11.9                           | 23.0                            | 0.2 | 29.3                             | 0.64 | 0.60 |
| BARAJAS PUEBLO              | Urban<br>Background | 0.809 | 11.2                           | 25.1                            | 0.2 | 32.2                             | 0.65 | 0.62 |
| ARTURO SORIA                | Urban<br>Background | 0.838 | 15.4                           | 23.2                            | 0.2 | 29.8                             | 0.63 | 0.57 |
| ENSANCHE DE VALLECAS        | Urban<br>Background | 0.876 | 16.0                           | 24.6                            | 0.2 | 32.6                             | 0.64 | 0.58 |

|                       |                  |       |      |      |     |      |      |      |
|-----------------------|------------------|-------|------|------|-----|------|------|------|
| PLAZA DEL CARMEN      | Urban Background | 0.723 | 24.0 | 29.9 | 0.4 | 37.0 | 0.59 | 0.47 |
| SEGOVIA 2             | Traffic          | 0.973 | 3.5  | 13.6 | 0.0 | 17.0 | 0.84 | 0.71 |
| VILLAREJO DE SALVANES | Traffic          | 0.992 | 3.1  | 10.6 | 0.0 | 14.6 | 0.78 | 0.71 |
| COLMENAR VIEJO        | Traffic          | 0.992 | 0.8  | 13.0 | 0.0 | 17.3 | 0.78 | 0.70 |
| ALCOBENDAS            | Traffic          | 0.928 | 0.8  | 17.8 | 0.0 | 23.6 | 0.80 | 0.70 |
| GETAFE                | Traffic          | 0.916 | 8.8  | 16.9 | 0.1 | 23.1 | 0.80 | 0.70 |
| ALCALA DE HENARES     | Traffic          | 0.866 | 10.0 | 19.3 | 0.1 | 25.0 | 0.83 | 0.69 |
| LEGANES               | Traffic          | 0.871 | 12.4 | 18.4 | 0.2 | 25.7 | 0.79 | 0.68 |
| BARRIO DEL PILAR      | Traffic          | 0.881 | 9.0  | 20.9 | 0.1 | 28.2 | 0.64 | 0.62 |
| COLLADA               | Traffic          | 0.792 | 18.9 | 24.8 | 0.3 | 31.2 | 0.80 | 0.61 |
| COLLADO VILLALBA      | Traffic          | 0.784 | 19.3 | 23.6 | 0.3 | 31.7 | 0.73 | 0.59 |
| ESCUELAS AGUIRRE      | Traffic          | 0.830 | 16.5 | 23.7 | 0.2 | 29.9 | 0.63 | 0.54 |
| PZ. FERNANDEZ LADREDA | Traffic          | 0.798 | 22.1 | 26.7 | 0.3 | 33.4 | 0.63 | 0.48 |

---
